# Supplementary material
Source: HighWire-hosted journal article supplement (https://www.ajnr.org/content/suppl/2010/08/03/ajnr.A2167)
Supplement: 2167_materials.pdf [file 2167_materials.pdf]

**On-line Table: Reported cases of KTS and spinal AVMs**

| Report No.                             | No. of Patients | Age, Sex         | SAVM Type and Location                                                                                      | Authors' Presumed Signs of KTS                                                                                      | Signs Incompatible with KTS                                                                                                                                                                             | Possible Alternative Diagnosis <sup>a</sup>                                                                                                               |
|----------------------------------------|-----------------|------------------|-------------------------------------------------------------------------------------------------------------|---------------------------------------------------------------------------------------------------------------------|---------------------------------------------------------------------------------------------------------------------------------------------------------------------------------------------------------|-----------------------------------------------------------------------------------------------------------------------------------------------------------|
| 1) Rohany et al <sup>4</sup>           | 2               | Case I: 37-Y-F   | Case I: T12-L3 single-hole spinal cord fistulas                                                             | Case I: limb hypertrophy, surgical removal of "venous malformations"                                                | Case I: venous varices limited to foot, foot was warmer, no evidence of LM or CM                                                                                                                        | Case I: NA                                                                                                                                                |
|                                        |                 | Case II: 29-Y-F  | Case II: C6-T1 AVM drained to paraspinous veins and fed by branches of vertebral and costocervical arteries | Case II: multiple VMs of extremities, chest wall, spleen, and pulmonary parenchyma with pulmonary vein varicosities | Case II: All 4 extremities and trunk were involved, pulmonary lesions and varicosities, no VM or CM                                                                                                     | Case II: NA                                                                                                                                               |
| 2) Alexander et al <sup>5</sup>        | 1               | 30-Y-M           | T3-T4 paraspinous AVM                                                                                       | VMs, cutaneous "hemangiomas," and hemihypertrophy                                                                   | Unusual bilateral syndactyly and macrodactyly with port-wine stain of trunk                                                                                                                             | CLOVES syndrome (paravertebral lipomatous mass insinuating into spinal canal, scoliosis, furrowed soles, bilateral foot/limb anomalies, paraspinous AVMs) |
| 3) Brunaud et al <sup>6</sup>          | 1               | 39-Y-M           | Thrombosis of anterior spinal artery/artery of Adamkiewicz                                                  | Arm hypertrophy with disseminated cutaneous "angioma"                                                               | Cerebral ischemia from internal carotid dissection, hemihypertrophy, bilateral leg hypertrophy, and varices; lack of LM or CM                                                                           | NA                                                                                                                                                        |
| 4) Nakstad et al <sup>7</sup>          | 1               | 13-Y-F           | T11-L2 dural fistulas                                                                                       | Right leg "gigantism," skin angiomas of tface and gluteal region                                                    | Facial birthmark, blindness, and increasingly progressive overgrowth                                                                                                                                    | NA                                                                                                                                                        |
| 5) Kojima et al <sup>8</sup>           | 1               | 28-Y-F           | T11-L2 posterior extramedullary AVM                                                                         | Nevus flammeus, varices, and hypertrophy of leg                                                                     | Warmer leg and atypical distribution of cutaneous stain                                                                                                                                                 | CM-AVM (RASA1 mutation)?                                                                                                                                  |
| 6) Szajner et al <sup>9</sup>          | 1               | 48-Y-F           | Several AVFs supplied by thyrocervical and costocervical trunks                                             | Cutaneous and subcutaneous "angiodysplasia" of left hemithorax                                                      | Fatty overgrowth of paraspinous region with nonspecific "angiodysplasia"                                                                                                                                | NA                                                                                                                                                        |
| 7) Arai et al <sup>10</sup>            | 1               | 37-Y-M           | "Arteriovenous hemangioma"                                                                                  | Truncal tumor, "angiomatic nevi," right leg hypertrophy, and deformities                                            | Huge infiltrative truncal mass insinuating into spinal canal with small truncal stain                                                                                                                   | CLOVES syndrome (paravertebral lipomatous mass insinuating into spinal canal, severe scoliosis, foot/limb anomalies, paraspinous AVMs)                    |
| 8) Benhaïem-Sigaux et al <sup>11</sup> | 1               | 9-Y-F            | T11-12 intramedullary AVM                                                                                   | Hypertrophic right leg, varix, and cutaneous angioma of leg and flank                                               | Diagnosis is vague, no photos or proof of embryonal veins or LM                                                                                                                                         | NA                                                                                                                                                        |
| 9) Djindjian et al <sup>12</sup>       | 5               | Case I: 13-Y-M   | Case I: T9-T12 spinal AVM                                                                                   | Case I: superficial varicosities                                                                                    | Case I: arteriovenous fistula of leg, vertebral "hemangioma," lack of LM or CM                                                                                                                          | Case I: NA                                                                                                                                                |
|                                        |                 | Case II: 19-Y-F  | Case II: T4+5 spinal AVM                                                                                    | Case II: right arm phlebectasia and extensive AVMs                                                                  | Case II: extensive AVM of arm, subclavian ectasia, subarachnoid hemorrhage, vertebral erosions and limb; photo and bony changes on arm; x-rays are not those of KTS                                     | Case II: NA                                                                                                                                               |
|                                        |                 | Case III: 19-Y-M | Case III: T9-L2 intramedullary "angioma"                                                                    | Case III: cutaneous angioma of thigh and umbilicus                                                                  | Case III: distribution of "angioma," warmer limb, marked kyphoscoliosis, and subarachnoid hemorrhage                                                                                                    | Case III: NA                                                                                                                                              |
|                                        |                 | Case IV: 15-Y-F  | Case IV: L1-2 intramedullary AVM                                                                            | Case IV: L1-2 intramedullary AVM                                                                                    | Case IV: subarachnoid hemorrhage, knee AVM, family history of premature death from intracranial hemorrhage are not KTS features; photo is suggestive of ischemic ulcerations; lack of classic CM and LM | Case IV: NA                                                                                                                                               |
|                                        |                 | Case V: 15-Y-M   | Case V: lower spinal cord and cauda equina AVM                                                              | Case V: hypertrophic right leg with varices                                                                         | Case V: numerous AVMs of leg                                                                                                                                                                            | Case V: NA                                                                                                                                                |
| 10) Rodesch et al <sup>13</sup>        | 3               | NA               | NA                                                                                                          | No data presented to support diagnosis of KTS                                                                       | No data given                                                                                                                                                                                           | NA                                                                                                                                                        |
| 11) Schulz and Neumann <sup>14</sup>   | 1               | 24-Y-M           | T6-8 vascular malformation-necrotizing myelopathy (Foix-Alajouanine syndrome)                               | Arteriovenous shunts, varicose-like superficial venous system, warmer leg                                           | Increased flow velocity in leg arteries/arteriovenous shunts; warmer leg and generalized sweating are not signs of KTS; photo, poor quality, not typical                                                | CM-AVM (RASA1 mutation)?                                                                                                                                  |
| 12) Forster and Kazner <sup>15</sup>   | 1               | 10-Y-F           | T11-L2 spinal angioma                                                                                       | Larger right leg with nevus flammeus, scarred skin with "erosions"; dorsum of foot and toes were edematous          | Pattern of overgrowth in photos, edema/swelling of dorsum of foot and toes, impalpable foot pulses not typical signs of KTS                                                                             | CM-AVM (RASA1 mutation)?                                                                                                                                  |

Table continues

**On-line Appendix**

**On-line Table: Reported cases of KTS and spinal AVMs (Continued)**

| Report No.                                | No. of Patients | Age, Sex | SAVM Type and Location                                          | Authors' Presumed Signs of KTS                                                                                                                           | Signs Incompatible with KTS                                                                                                                                                                                    | Possible Alternative Diagnosis <sup>a</sup> |
|-------------------------------------------|-----------------|----------|-----------------------------------------------------------------|----------------------------------------------------------------------------------------------------------------------------------------------------------|----------------------------------------------------------------------------------------------------------------------------------------------------------------------------------------------------------------|---------------------------------------------|
| 13) Gourie-Devi and Prakash <sup>16</sup> | 1               | 25-Y-M   | C7-T2 epidural "hemangioma"                                     | Deep purple nevus of shoulder and upper extremity                                                                                                        | Birthmark, distribution, and lack of VM and CM are not typical of KTS                                                                                                                                          | NA                                          |
| 14) Carter et al <sup>17</sup>            | 1               | 20-Y-M   | T5-L2 hypervascular tumor                                       | Right leg hypertrophied, venous varicosities and supernumerary toes                                                                                      | Bilateral thoracic cutaneous "hemangioma" and angiolipomas are not typical for KTS                                                                                                                             | CLOVES syndrome?                            |
| 15) Pichierri et al <sup>18</sup>         | 1               | NA       | C5-6 intramedullary cervical cavernoma                          | Right bony and soft-tissue hemihypertrophy and cutaneous angiomas of right hand; cutaneous telangiectasias of right leg                                  | Right arm hemihypertrophy and cutaneous "angiomas" and cutaneous telangiectasias are not KTS features                                                                                                          | NA                                          |
| 16) Tan et al <sup>19</sup>               | 1               | 19-Y-M   | T2-6 juvenile-type spinal AVM                                   | Right lower limb progressively enlarged                                                                                                                  | Multiple warts of face, trunk, and right extremities and warmer leg are not KTS signs                                                                                                                          | NA                                          |
| 17) Rosenblum et al <sup>20</sup>         | 1               | NA       | Intradural SAVM                                                 | NA                                                                                                                                                       | No data given                                                                                                                                                                                                  | NA                                          |
| 18) Den Hartog Jager <sup>21</sup>        | 1               | 27-Y-M   | T9-10 "intradural angioma venosum"                              | Congenital "lymphangioma"; asymmetric legs and telangiectasia                                                                                            | Lack of classic venous anomalies and lymphatic malformation; photos are not supportive of KTS                                                                                                                  | NA                                          |
| 19) Eber et al <sup>22</sup>              | 1               | 32-Y-M   | AVM of conus medullaris                                         | Left lower extremity "angioma" and varices                                                                                                               | Facial "angiomas" and varices, pelvic AV fistulae, claudication, and hyperdynamic circulation are not features of KTS                                                                                          | NA                                          |
| 20) Pitagoras de Mattos <sup>23</sup>     | 1               | 33-Y-M   | T9-10 unspecified "diffuse angioma"                             | Red discoloration of skin, several red irregular lesions ranging from 5 to 20 mm in face, back, arms, and legs; atrophy of lower extremity and scoliosis | Progressive nature, multiple small stains in hemifacial and periauricular distribution; similar lesions on back, arms, and legs; atrophy of lower extremity and scoliosis are very unusual presentation of KTS | CM-AVM?                                     |
| 21) Vajda and Brozmanova <sup>24</sup>    | 1               | 10-Y-M   | T12-L2 "hemangioma"                                             | Right leg overgrowth and vascular stain                                                                                                                  | Lumbosacral geographic "hemangioma" extending into medial side of right lower extremity; warmer affected leg and tethered cord are not features of KTS                                                         | CLOVES syndrome?                            |
| 22) Jyoichi et al <sup>25</sup>           | 1               | 67-Y-M   | Small AVM supplied by artery of Adamkiewicz                     | Vascular birthmark and varicose veins of left leg                                                                                                        | AVM of left iliac vessels, stroke, hearing loss, lack of lymphatic component, and cyanosis of limb are not features of KTS                                                                                     | CM-AVM?                                     |
| 23) Fukutake et al <sup>26</sup>          | 1               | 47-Y-M   | Left C5 and T4 nidus-like blush                                 | Port-wine stain of right leg and upper back with venous dilation                                                                                         | Combined upper and lower limb syndactyly, preferential overgrowth below knee, lack of LM, and faint color of port-wine stain are not features of KTS                                                           | NA                                          |
| 24) Sharma <sup>27</sup>                  | 1               | 16-Y-M   | Multiple intradural spinal cord AVFs and renal artery aneurysms | Progressive weakness of bilateral lower limbs with marginal vein                                                                                         | Nevoid geographic skin lesion shown in photos is not classic for KTS, no definite overgrowth of fatty and lymphatic tissue, presence of marginal vein is not pathognomonic of KTS                              | NA                                          |

<sup>a</sup> ? indicates "not certain."

## On-line Appendix

1. Albright A, Pollack IF, Adelson P. *Principles and Practice of Pediatric Neurosurgery*. New York: Thieme; 1999
2. Algra P, Valk J, Heimans JJ. *Diagnosis and Therapy of Spinal Tumors*. St. Louis: Quality Medical Publishing; 1997
3. Benzel E, Stillerman CB. *The Thoracic Spine*. St. Louis: Quality Medical Publishing; 1999
4. Biller J, Mathews KD, Love BB. *Stroke in Children and Young Adults*. Boston: Butterworth-Heinemann; 1994
5. Bissonnette B, Dalens BJ, Luginbuehl I, et al. *Syndromes: Rapid Recognition and Perioperative Implications*. New York: McGraw-Hill Professional; 2006
6. Bradley W Jr, Aguilera IL. *Los 100 Diagnosticos Principales en Sistema Vascular*. Madrid: Elsevier Espana; 2004
7. Byrne TN, Waxman SG. *Spinal Cord Compression: Diagnosis and Principles of Management*. St. Louis: Quality Medical Publishing; 1990
8. Chen H. *Atlas of Genetic Diagnosis and Counseling*. Totowa, New Jersey: Humana Press; 2005
9. Citow J, Macdonald R, Weir B, et al. *Comprehensive Neurosurgery Board Review*. New York: Thieme; 2000
10. David RB. *Child and Adolescent Neurology: Blackwell's Neurology and Psychiatry Access Series*. Richmond, Virginia: Blackwell Publishing; 2005
11. Djindjian R, Nadjmi M. *Angiography of Spinal Column and Spinal Cord Tumors*. New York: George Thieme-Stratton; 1981
12. Djindjian R, Pia HW. *Spinal Angiomas: Advances in Diagnosis and Therapy*. New York: Springer; 1978
13. Farmer T. *Pediatric Neurology*. Hagerstown, Pennsylvania: Harper & Row; 1983
14. Gorlin R, Cohen MM, Hennekam RCM. *Syndromes of the Head and Neck*. New York: Oxford University Press; 2001
15. Hankey G, Wardlaw JM. *Clinical Neurology*. New York: Demos Medical Publishing; 2002
16. Herkowitz H. *The Cervical Spine Surgery Atlas*. Philadelphia: Lippincott Williams & Wilkins; 2003
17. Hurst R, Rosenwasser RH. *Interventional Neuroradiology*. Boca Raton, Florida: CRC Press; 2007
18. Johnson B, Mathis JM, Staats PS. *Image-Guided Spine Interventions*. New York: Springer; 2003
19. Kim D. *Surgery of the Pediatric Spine*. New York: Thieme; 2008
20. Lasjaunias P. *Vascular Diseases in Neonates, Infants and Children: Interventional Neuroradiology Management*. New York: Springer; 1997
21. Lasjaunias P, TerBrugge KG, Berenstein A. *Surgical Neuroangiography: Clinical and Interventional Aspects in Children*. Vol. 3. New York: Springer; 2006
22. Menkes J, Sarnat HB, Maria BL. *Child Neurology*. Baltimore: Lippincott, Williams & Wilkins; 2006
23. Miller N, Walsh FB, Newman NJ, et al. *Walsh and Hoyt's Clinical Neuro-Ophthalmology*. Vol 2. Philadelphia: Lippincott Williams & Wilkins; 2004
24. Morris P. *Interventional and Endovascular Therapy of the Nervous System: A Practical Guide*. New York: Springer; 2001
25. Mulliken J, Young AE. *Vascular Birthmarks, Hemangiomas and Malformations*. Philadelphia: W.B. Saunders Co; 1988
26. Mumenthaler M, Mattle H, Taub E. *Neurology*. New York: Thieme; 2004
27. Post M. *Radiographic Evaluation of the Spine: Current Advances with Emphasis on Computed Tomography*. St. Louis: Mosby; 1980
28. Pryse-Phillips W. *Companion to Clinical Neurology*. New York: Oxford University Press; 2003
29. Raffel C, Harsh GR. *The Molecular Basis of Neurosurgical Disease: Concepts in Neurosurgery*. Philadelphia: Williams & Wilkins; 1997
30. Reiser M, Semmler W, Hricak H. *Magnetic Resonance Tomography*. Berlin: Springer; 2007
31. Ruggieri M, Castroviejo IP, Rocco C. *Neurocutaneous Disorders: Phakomatoses and Hamartoneoplastic Syndrome*. New York: Springer; 2008
32. Schwartzman R. *Differential Diagnosis in Neurology*. Amsterdam: IOS Press; 2006
33. Taveras J, Wood EH. *Diagnostic Neuroradiology*. Baltimore: Williams & Wilkins; 1976
34. Tonn J-C, Westphal M, Rutka JT, et al. *Neuro-Oncology of CNS Tumors*. New York: Springer Science & Business; 2006
35. Tortori-Donati P, Rossi A, Biancheri R. *Pediatric Neuroradiology: Brain, Head, Neck and Spine*. St. Louis: Quality Medical Publishing; 2005
36. Weir B. *Subarachnoid Hemorrhage: Causes and Cures*. New York: Oxford University Press; 1998
